# Supplementary material
Source: HighWire-hosted journal article supplement (https://tobaccocontrol.bmj.com/content/30/1/42)
Supplement: inline-supplementary-material-1 [file inline-supplementary-material-1.pdf]

## Supplementary file 1

| SERIES NO. | RELEASE YEAR (YYYY) | NAME OF THE SERIES        | SEASON NUMBER | EPISODE NUMBER | RATING | PRODUCTION COMPANY                                            | DISTRIBUTOR/BANNER | LENGTH OF EPISODE (MINUTES) | NUMBER OF TOBACCO INCIDENTS |
|------------|---------------------|---------------------------|---------------|----------------|--------|---------------------------------------------------------------|--------------------|-----------------------------|-----------------------------|
| 1          | 2017                | THE MARVELOUS MRS. MAISEL | 1             | 1              | 16+    | DOROTHY PARKER DRANK HERE PRODUCTIONS/ PICROW/ AMAZON STUDIOS | AMAZON PRIME       | 56                          | 139                         |
| 1          | 2017                | THE MARVELOUS MRS. MAISEL | 1             | 2              | 16+    | DOROTHY PARKER DRANK HERE PRODUCTIONS/ PICROW/ AMAZON STUDIOS | AMAZON PRIME       | 51                          | 70                          |
| 1          | 2017                | THE MARVELOUS MRS. MAISEL | 1             | 3              | 16+    | DOROTHY PARKER DRANK HERE PRODUCTIONS/ PICROW/ AMAZON STUDIOS | AMAZON PRIME       | 49                          | 116                         |
| 1          | 2017                | THE MARVELOUS MRS. MAISEL | 1             | 4              | 16+    | DOROTHY PARKER DRANK HERE PRODUCTIONS/ PICROW/ AMAZON STUDIOS | AMAZON PRIME       | 55                          | 43                          |
| 1          | 2017                | THE MARVELOUS MRS. MAISEL | 1             | 5              | 16+    | DOROTHY PARKER DRANK HERE PRODUCTIONS/ PICROW/ AMAZON STUDIOS | AMAZON PRIME       | 47                          | 108                         |

|   |      |                           |   |   |     |                                                               |              |    |     |
|---|------|---------------------------|---|---|-----|---------------------------------------------------------------|--------------|----|-----|
| 1 | 2017 | THE MARVELOUS MRS. MAISEL | 1 | 6 | 16+ | DOROTHY PARKER DRANK HERE PRODUCTIONS/ PICROW/ AMAZON STUDIOS | AMAZON PRIME | 47 | 96  |
| 1 | 2017 | THE MARVELOUS MRS. MAISEL | 1 | 7 | 16+ | DOROTHY PARKER DRANK HERE PRODUCTIONS/ PICROW/ AMAZON STUDIOS | AMAZON PRIME | 51 | 92  |
| 1 | 2017 | THE MARVELOUS MRS. MAISEL | 1 | 8 | 16+ | DOROTHY PARKER DRANK HERE PRODUCTIONS/ PICROW/ AMAZON STUDIOS | AMAZON PRIME | 61 | 219 |
| 1 | 2018 | THE MARVELOUS MRS. MAISEL | 2 | 1 | 16+ | DOROTHY PARKER DRANK HERE PRODUCTIONS/ PICROW/ AMAZON STUDIOS | AMAZON PRIME | 54 | 165 |
| 1 | 2018 | THE MARVELOUS MRS. MAISEL | 2 | 2 | 16+ | DOROTHY PARKER DRANK HERE PRODUCTIONS/ PICROW/ AMAZON STUDIOS | AMAZON PRIME | 57 | 105 |
| 1 | 2018 | THE MARVELOUS MRS. MAISEL | 2 | 3 | 16+ | DOROTHY PARKER DRANK HERE PRODUCTIONS/ PICROW/ AMAZON STUDIOS | AMAZON PRIME | 47 | 74  |
| 1 | 2018 | THE MARVELOUS MRS. MAISEL | 2 | 4 | 16+ | DOROTHY PARKER DRANK HERE PRODUCTIONS/                        | AMAZON PRIME | 52 | 22  |

|          |      |                           |   |    |     |                                                               |              |    |     |
|----------|------|---------------------------|---|----|-----|---------------------------------------------------------------|--------------|----|-----|
|          |      |                           |   |    |     | PICROW/ AMAZON STUDIOS                                        |              |    |     |
| <b>1</b> | 2018 | THE MARVELOUS MRS. MAISEL | 2 | 5  | 16+ | DOROTHY PARKER DRANK HERE PRODUCTIONS/ PICROW/ AMAZON STUDIOS | AMAZON PRIME | 52 | 117 |
| <b>1</b> | 2018 | THE MARVELOUS MRS. MAISEL | 2 | 6  | 16+ | DOROTHY PARKER DRANK HERE PRODUCTIONS/ PICROW/ AMAZON STUDIOS | AMAZON PRIME | 47 | 23  |
| <b>1</b> | 2018 | THE MARVELOUS MRS. MAISEL | 2 | 7  | 16+ | DOROTHY PARKER DRANK HERE PRODUCTIONS/ PICROW/ AMAZON STUDIOS | AMAZON PRIME | 54 | 83  |
| <b>1</b> | 2018 | THE MARVELOUS MRS. MAISEL | 2 | 8  | 16+ | DOROTHY PARKER DRANK HERE PRODUCTIONS/ PICROW/ AMAZON STUDIOS | AMAZON PRIME | 43 | 62  |
| <b>1</b> | 2018 | THE MARVELOUS MRS. MAISEL | 2 | 9  | 16+ | DOROTHY PARKER DRANK HERE PRODUCTIONS/ PICROW/ AMAZON STUDIOS | AMAZON PRIME | 52 | 64  |
| <b>1</b> | 2018 | THE MARVELOUS MRS. MAISEL | 2 | 10 | 16+ | DOROTHY PARKER DRANK HERE PRODUCTIONS/ PICROW/ AMAZON STUDIOS | AMAZON PRIME | 59 | 54  |
| <b>2</b> | 2016 | STRANGER THINGS           | 1 | 1  | 16+ | 21 LAPS ENTERTAINMENT;                                        | NETFLIX      | 48 | 25  |

|   |      |                    |   |   |     |                                                             |         |    |    |
|---|------|--------------------|---|---|-----|-------------------------------------------------------------|---------|----|----|
|   |      |                    |   |   |     | MONKEY<br>MASSACRE;<br>NETFLIX                              |         |    |    |
| 2 | 2016 | STRANGER<br>THINGS | 1 | 2 | 16+ | 22 LAPS<br>ENTERTAINMENT;<br>MONKEY<br>MASSACRE;<br>NETFLIX | NETFLIX | 55 | 25 |
| 2 | 2016 | STRANGER<br>THINGS | 1 | 3 | 16+ | 22 LAPS<br>ENTERTAINMENT;<br>MONKEY<br>MASSACRE;<br>NETFLIX | NETFLIX | 51 | 4  |
| 2 | 2016 | STRANGER<br>THINGS | 1 | 4 | 16+ | 22 LAPS<br>ENTERTAINMENT;<br>MONKEY<br>MASSACRE;<br>NETFLIX | NETFLIX | 50 | 12 |
| 2 | 2016 | STRANGER<br>THINGS | 1 | 5 | 16+ | 22 LAPS<br>ENTERTAINMENT;<br>MONKEY<br>MASSACRE;<br>NETFLIX | NETFLIX | 52 | 4  |
| 2 | 2016 | STRANGER<br>THINGS | 1 | 6 | 16+ | 22 LAPS<br>ENTERTAINMENT;<br>MONKEY<br>MASSACRE;<br>NETFLIX | NETFLIX | 46 | 47 |
| 2 | 2016 | STRANGER<br>THINGS | 1 | 7 | 16+ | 22 LAPS<br>ENTERTAINMENT;<br>MONKEY<br>MASSACRE;<br>NETFLIX | NETFLIX | 42 | 1  |

|   |      |                 |   |   |     |                                                       |         |    |    |
|---|------|-----------------|---|---|-----|-------------------------------------------------------|---------|----|----|
| 2 | 2016 | STRANGER THINGS | 1 | 8 | 16+ | 22 LAPS ENTERTAINMENT;<br>MONKEY MASSACRE;<br>NETFLIX | NETFLIX | 54 | 7  |
| 2 | 2016 | STRANGER THINGS | 2 | 1 | 16+ | 22 LAPS ENTERTAINMENT;<br>MONKEY MASSACRE;<br>NETFLIX | NETFLIX | 47 | 21 |
| 2 | 2016 | STRANGER THINGS | 2 | 2 | 16+ | 22 LAPS ENTERTAINMENT;<br>MONKEY MASSACRE;<br>NETFLIX | NETFLIX | 55 | 23 |
| 2 | 2016 | STRANGER THINGS | 2 | 3 | 16+ | 22 LAPS ENTERTAINMENT;<br>MONKEY MASSACRE;<br>NETFLIX | NETFLIX | 50 | 4  |
| 2 | 2016 | STRANGER THINGS | 2 | 4 | 16+ | 22 LAPS ENTERTAINMENT;<br>MONKEY MASSACRE;<br>NETFLIX | NETFLIX | 46 | 10 |
| 2 | 2016 | STRANGER THINGS | 2 | 5 | 16+ | 22 LAPS ENTERTAINMENT;<br>MONKEY MASSACRE;<br>NETFLIX | NETFLIX | 57 | 5  |
| 2 | 2016 | STRANGER THINGS | 2 | 6 | 16+ | 22 LAPS ENTERTAINMENT;<br>MONKEY                      | NETFLIX | 51 | 6  |

|          |      |                 |   |   |     |                                                                    |                                                                       |    |    |
|----------|------|-----------------|---|---|-----|--------------------------------------------------------------------|-----------------------------------------------------------------------|----|----|
|          |      |                 |   |   |     | MASSACRE;<br>NETFLIX                                               |                                                                       |    |    |
| <b>2</b> | 2016 | STRANGER THINGS | 2 | 7 | 16+ | 22 LAPS ENTERTAINMENT;<br>MONKEY MASSACRE;<br>NETFLIX              | NETFLIX                                                               | 45 | 18 |
| <b>2</b> | 2016 | STRANGER THINGS | 2 | 8 | 16+ | 22 LAPS ENTERTAINMENT;<br>MONKEY MASSACRE;<br>NETFLIX              | NETFLIX                                                               | 47 | 6  |
| <b>2</b> | 2016 | STRANGER THINGS | 2 | 9 | 16+ | 22 LAPS ENTERTAINMENT;<br>MONKEY MASSACRE;<br>NETFLIX              | NETFLIX                                                               | 61 | 15 |
| <b>3</b> | 2018 | BODYGAURD       | 1 | 1 | 16+ | WORLD PUBLICATIONS                                                 | NETFLIX                                                               | 58 | 0  |
| <b>3</b> | 2018 | BODYGAURD       | 1 | 2 | 16+ | WORLD PUBLICATIONS                                                 | NETFLIX                                                               | 58 | 0  |
| <b>3</b> | 2018 | BODYGAURD       | 1 | 3 | 16+ | WORLD PUBLICATIONS                                                 | NETFLIX                                                               | 57 | 0  |
| <b>3</b> | 2018 | BODYGAURD       | 1 | 4 | 16+ | WORLD PUBLICATIONS                                                 | NETFLIX                                                               | 57 | 0  |
| <b>3</b> | 2018 | BODYGAURD       | 1 | 5 | 16+ | WORLD PUBLICATIONS                                                 | NETFLIX                                                               | 57 | 0  |
| <b>3</b> | 2018 | BODYGAURD       | 1 | 6 | 16+ | WORLD PUBLICATIONS                                                 | NETFLIX                                                               | 75 | 0  |
| <b>4</b> | 2017 | RIVERDALE       | 1 | 1 | 13+ | BERLANTI PRODUCTIONS<br>ARCHIE COMICS<br>WARNER BROS TELEVISION OR | WARNER BROS TELEVISION<br>DISTRIBUTORS (US)/<br>NETFLIX INTERNATIONAL | 46 | 0  |

|   |      |           |   |   |     |                                                                                              |                                                                             |    |   |
|---|------|-----------|---|---|-----|----------------------------------------------------------------------------------------------|-----------------------------------------------------------------------------|----|---|
|   |      |           |   |   |     | CBS TELEVISION STUDIOS                                                                       |                                                                             |    |   |
| 4 | 2017 | RIVERDALE | 1 | 2 | 13+ | BERLANTI PRODUCTIONS<br>ARCHIE COMICS<br>WARNER BROS TELEVISION OR<br>CBS TELEVISION STUDIOS | WARNER BROS<br>TELEVISION<br>DISTRIBUTORS (US)/<br>NETFLIX<br>INTERNATIONAL | 42 | 0 |
| 4 | 2017 | RIVERDALE | 1 | 3 | 13+ | BERLANTI PRODUCTIONS<br>ARCHIE COMICS<br>WARNER BROS TELEVISION OR<br>CBS TELEVISION STUDIOS | WARNER BROS<br>TELEVISION<br>DISTRIBUTORS (US)/<br>NETFLIX<br>INTERNATIONAL | 42 | 0 |
| 4 | 2017 | RIVERDALE | 1 | 4 | 13+ | BERLANTI PRODUCTIONS<br>ARCHIE COMICS<br>WARNER BROS TELEVISION OR<br>CBS TELEVISION STUDIOS | WARNER BROS<br>TELEVISION<br>DISTRIBUTORS (US)/<br>NETFLIX<br>INTERNATIONAL | 42 | 0 |
| 4 | 2017 | RIVERDALE | 1 | 5 | 13+ | BERLANTI PRODUCTIONS<br>ARCHIE COMICS<br>WARNER BROS TELEVISION OR<br>CBS TELEVISION STUDIOS | WARNER BROS<br>TELEVISION<br>DISTRIBUTORS (US)/<br>NETFLIX<br>INTERNATIONAL | 42 | 0 |

|   |      |           |   |    |     |                                                                                                    |                                                                             |    |   |
|---|------|-----------|---|----|-----|----------------------------------------------------------------------------------------------------|-----------------------------------------------------------------------------|----|---|
| 4 | 2017 | RIVERDALE | 1 | 6  | 13+ | BERLANTI PRODUCTIONS<br>ARCHIE COMICS<br>WARNER BROS<br>TELEVISION OR<br>CBS TELEVISION<br>STUDIOS | WARNER BROS<br>TELIVISION<br>DISTRIBUTORS (US)/<br>NETFLIX<br>INTERNATIONAL | 42 | 0 |
| 4 | 2017 | RIVERDALE | 1 | 7  | 13+ | BERLANTI PRODUCTIONS<br>ARCHIE COMICS<br>WARNER BROS<br>TELEVISION OR<br>CBS TELEVISION<br>STUDIOS | WARNER BROS<br>TELIVISION<br>DISTRIBUTORS (US)/<br>NETFLIX<br>INTERNATIONAL | 42 | 0 |
| 4 | 2017 | RIVERDALE | 1 | 8  | 13+ | BERLANTI PRODUCTIONS<br>ARCHIE COMICS<br>WARNER BROS<br>TELEVISION OR<br>CBS TELEVISION<br>STUDIOS | WARNER BROS<br>TELIVISION<br>DISTRIBUTORS (US)/<br>NETFLIX<br>INTERNATIONAL | 42 | 0 |
| 4 | 2017 | RIVERDALE | 1 | 9  | 13+ | BERLANTI PRODUCTIONS<br>ARCHIE COMICS<br>WARNER BROS<br>TELEVISION OR<br>CBS TELEVISION<br>STUDIOS | WARNER BROS<br>TELIVISION<br>DISTRIBUTORS (US)/<br>NETFLIX<br>INTERNATIONAL | 42 | 0 |
| 4 | 2017 | RIVERDALE | 1 | 10 | 13+ | BERLANTI PRODUCTIONS<br>ARCHIE COMICS<br>WARNER BROS<br>TELEVISION OR                              | WARNER BROS<br>TELIVISION<br>DISTRIBUTORS (US)/<br>NETFLIX<br>INTERNATIONAL | 42 | 0 |



|   |      |           |   |    |     |                                                                                                                                  |                                                                                            |    |   |
|---|------|-----------|---|----|-----|----------------------------------------------------------------------------------------------------------------------------------|--------------------------------------------------------------------------------------------|----|---|
|   |      |           |   |    |     | CBS TELEVISION<br>STUDIOS                                                                                                        |                                                                                            |    |   |
| 4 | 2017 | RIVERDALE | 1 | 11 | 13+ | BERLANTI<br>PRODUCTIONS<br>ARCHIE COMICS<br>WARNER BROS<br>TELEVISION OR<br>CBS TELEVISION<br>STUDIOS                            | WARNER BROS<br>TELEVISION<br>DISTRIBUTORS (US)/<br>NETFLIX<br>INTERNATIONAL                | 42 | 0 |
| 4 | 2017 | RIVERDALE | 1 | 12 | 13+ | BERLANTI<br>PRODUCTIONS<br>ARCHIE COMICS<br>WARNER BROS<br>TELEVISION OR<br>CBS TELEVISION<br>STUDIOS                            | WARNER BROS<br>TELEVISION<br>DISTRIBUTORS (US)/<br>NETFLIX<br>INTERNATIONAL                | 42 | 0 |
| 4 | 2017 | RIVERDALE | 1 | 13 | 13+ | BERLANTI<br>PRODUCTIONS<br>ARCHIE COMICS<br>WARNER BROS<br>TELEVISION OR<br>CBS TELEVISION<br>STUDIOS                            | WARNER BROS<br>TELEVISION<br>DISTRIBUTORS (US)/<br>NETFLIX<br>INTERNATIONAL                | 42 | 0 |
| 4 | 2017 | RIVERDALE | 2 | 1  | 13+ | THE CW<br>TELEVISION<br>NETWORK, ARCHIE<br>COMICS<br>PUBLICATIONS,<br>WARNER BROS.<br>TELEVISION,<br>CANADA FILM<br>CAPITAL, CBS | THE CW NETWORK,<br>NETFLIX, WARNER<br>ARCHIVE COLLECTION,<br>DIZIMAX, WARNER<br>HOME VIDEO | 42 | 0 |

|   |      |           |   |   |     |                                                                                                                             |                                                                                |    |   |
|---|------|-----------|---|---|-----|-----------------------------------------------------------------------------------------------------------------------------|--------------------------------------------------------------------------------|----|---|
|   |      |           |   |   |     | TELEVISION STUDIOS                                                                                                          |                                                                                |    |   |
| 4 | 2017 | RIVERDALE | 2 | 2 | 13+ | THE CW TELEVISION NETWORK, ARCHIE COMICS PUBLICATIONS, WARNER BROS. TELEVISION, CANADA FILM CAPITAL, CBS TELEVISION STUDIOS | THE CW NETWORK, NETFLIX, WARNER ARCHIVE COLLECTION, DIZIMAX, WARNER HOME VIDEO | 42 | 0 |
| 4 | 2017 | RIVERDALE | 2 | 3 | 13+ | THE CW TELEVISION NETWORK, ARCHIE COMICS PUBLICATIONS, WARNER BROS. TELEVISION, CANADA FILM CAPITAL, CBS TELEVISION STUDIOS | THE CW NETWORK, NETFLIX, WARNER ARCHIVE COLLECTION, DIZIMAX, WARNER HOME VIDEO | 42 | 0 |
| 4 | 2017 | RIVERDALE | 2 | 4 | 13+ | THE CW TELEVISION NETWORK, ARCHIE COMICS PUBLICATIONS, WARNER BROS. TELEVISION, CANADA FILM CAPITAL, CBS                    | THE CW NETWORK, NETFLIX, WARNER ARCHIVE COLLECTION, DIZIMAX, WARNER HOME VIDEO | 42 | 0 |

|   |      |           |   |   |     |                                                                                                                             |                                                                                |    |   |
|---|------|-----------|---|---|-----|-----------------------------------------------------------------------------------------------------------------------------|--------------------------------------------------------------------------------|----|---|
|   |      |           |   |   |     | TELEVISION STUDIOS                                                                                                          |                                                                                |    |   |
| 4 | 2017 | RIVERDALE | 2 | 5 | 13+ | THE CW TELEVISION NETWORK, ARCHIE COMICS PUBLICATIONS, WARNER BROS. TELEVISION, CANADA FILM CAPITAL, CBS TELEVISION STUDIOS | THE CW NETWORK, NETFLIX, WARNER ARCHIVE COLLECTION, DIZIMAX, WARNER HOME VIDEO | 42 | 0 |
| 4 | 2017 | RIVERDALE | 2 | 6 | 13+ | THE CW TELEVISION NETWORK, ARCHIE COMICS PUBLICATIONS, WARNER BROS. TELEVISION, CANADA FILM CAPITAL, CBS TELEVISION STUDIOS | THE CW NETWORK, NETFLIX, WARNER ARCHIVE COLLECTION, DIZIMAX, WARNER HOME VIDEO | 42 | 0 |
| 4 | 2017 | RIVERDALE | 2 | 7 | 13+ | THE CW TELEVISION NETWORK, ARCHIE COMICS PUBLICATIONS, WARNER BROS. TELEVISION, CANADA FILM CAPITAL, CBS                    | THE CW NETWORK, NETFLIX, WARNER ARCHIVE COLLECTION, DIZIMAX, WARNER HOME VIDEO | 42 | 0 |

|   |      |           |   |    |     |                                                                                                                             |                                                                                |    |   |
|---|------|-----------|---|----|-----|-----------------------------------------------------------------------------------------------------------------------------|--------------------------------------------------------------------------------|----|---|
|   |      |           |   |    |     | TELEVISION STUDIOS                                                                                                          |                                                                                |    |   |
| 4 | 2017 | RIVERDALE | 2 | 8  | 13+ | THE CW TELEVISION NETWORK, ARCHIE COMICS PUBLICATIONS, WARNER BROS. TELEVISION, CANADA FILM CAPITAL, CBS TELEVISION STUDIOS | THE CW NETWORK, NETFLIX, WARNER ARCHIVE COLLECTION, DIZIMAX, WARNER HOME VIDEO | 42 | 0 |
| 4 | 2017 | RIVERDALE | 2 | 9  | 13+ | THE CW TELEVISION NETWORK, ARCHIE COMICS PUBLICATIONS, WARNER BROS. TELEVISION, CANADA FILM CAPITAL, CBS TELEVISION STUDIOS | THE CW NETWORK, NETFLIX, WARNER ARCHIVE COLLECTION, DIZIMAX, WARNER HOME VIDEO | 42 | 0 |
| 4 | 2018 | RIVERDALE | 2 | 10 | 13+ | THE CW TELEVISION NETWORK, ARCHIE COMICS PUBLICATIONS, WARNER BROS. TELEVISION, CANADA FILM CAPITAL, CBS                    | THE CW NETWORK, NETFLIX, WARNER ARCHIVE COLLECTION, DIZIMAX, WARNER HOME VIDEO | 42 | 0 |

|   |      |           |   |    |     |                                                                                                                             |                                                                                |    |   |
|---|------|-----------|---|----|-----|-----------------------------------------------------------------------------------------------------------------------------|--------------------------------------------------------------------------------|----|---|
|   |      |           |   |    |     | TELEVISION STUDIOS                                                                                                          |                                                                                |    |   |
| 4 | 2018 | RIVERDALE | 2 | 11 | 13+ | THE CW TELEVISION NETWORK, ARCHIE COMICS PUBLICATIONS, WARNER BROS. TELEVISION, CANADA FILM CAPITAL, CBS TELEVISION STUDIOS | THE CW NETWORK, NETFLIX, WARNER ARCHIVE COLLECTION, DIZIMAX, WARNER HOME VIDEO | 42 | 0 |
| 4 | 2018 | RIVERDALE | 2 | 12 | 13+ | THE CW TELEVISION NETWORK, ARCHIE COMICS PUBLICATIONS, WARNER BROS. TELEVISION, CANADA FILM CAPITAL, CBS TELEVISION STUDIOS | THE CW NETWORK, NETFLIX, WARNER ARCHIVE COLLECTION, DIZIMAX, WARNER HOME VIDEO | 42 | 0 |
| 4 | 2018 | RIVERDALE | 2 | 13 | 13+ | THE CW TELEVISION NETWORK, ARCHIE COMICS PUBLICATIONS, WARNER BROS. TELEVISION, CANADA FILM CAPITAL, CBS                    | THE CW NETWORK, NETFLIX, WARNER ARCHIVE COLLECTION, DIZIMAX, WARNER HOME VIDEO | 42 | 0 |

|   |      |           |   |    |     |                                                                                                                             |                                                                                |    |   |
|---|------|-----------|---|----|-----|-----------------------------------------------------------------------------------------------------------------------------|--------------------------------------------------------------------------------|----|---|
|   |      |           |   |    |     | TELEVISION STUDIOS                                                                                                          |                                                                                |    |   |
| 4 | 2018 | RIVERDALE | 2 | 14 | 13+ | THE CW TELEVISION NETWORK, ARCHIE COMICS PUBLICATIONS, WARNER BROS. TELEVISION, CANADA FILM CAPITAL, CBS TELEVISION STUDIOS | THE CW NETWORK, NETFLIX, WARNER ARCHIVE COLLECTION, DIZIMAX, WARNER HOME VIDEO | 42 | 0 |
| 4 | 2018 | RIVERDALE | 2 | 15 | 13+ | THE CW TELEVISION NETWORK, ARCHIE COMICS PUBLICATIONS, WARNER BROS. TELEVISION, CANADA FILM CAPITAL, CBS TELEVISION STUDIOS | THE CW NETWORK, NETFLIX, WARNER ARCHIVE COLLECTION, DIZIMAX, WARNER HOME VIDEO | 42 | 0 |
| 4 | 2018 | RIVERDALE | 2 | 16 | 13+ | THE CW TELEVISION NETWORK, ARCHIE COMICS PUBLICATIONS, WARNER BROS. TELEVISION, CANADA FILM CAPITAL, CBS                    | THE CW NETWORK, NETFLIX, WARNER ARCHIVE COLLECTION, DIZIMAX, WARNER HOME VIDEO | 42 | 0 |

|   |      |           |   |    |     |                                                                                                                             |                                                                                |    |   |
|---|------|-----------|---|----|-----|-----------------------------------------------------------------------------------------------------------------------------|--------------------------------------------------------------------------------|----|---|
|   |      |           |   |    |     | TELEVISION STUDIOS                                                                                                          |                                                                                |    |   |
| 4 | 2018 | RIVERDALE | 2 | 17 | 13+ | THE CW TELEVISION NETWORK, ARCHIE COMICS PUBLICATIONS, WARNER BROS. TELEVISION, CANADA FILM CAPITAL, CBS TELEVISION STUDIOS | THE CW NETWORK, NETFLIX, WARNER ARCHIVE COLLECTION, DIZIMAX, WARNER HOME VIDEO | 42 | 0 |
| 4 | 2018 | RIVERDALE | 2 | 18 | 13+ | THE CW TELEVISION NETWORK, ARCHIE COMICS PUBLICATIONS, WARNER BROS. TELEVISION, CANADA FILM CAPITAL, CBS TELEVISION STUDIOS | THE CW NETWORK, NETFLIX, WARNER ARCHIVE COLLECTION, DIZIMAX, WARNER HOME VIDEO | 42 | 0 |
| 4 | 2018 | RIVERDALE | 2 | 19 | 13+ | THE CW TELEVISION NETWORK, ARCHIE COMICS PUBLICATIONS, WARNER BROS. TELEVISION, CANADA FILM CAPITAL, CBS                    | THE CW NETWORK, NETFLIX, WARNER ARCHIVE COLLECTION, DIZIMAX, WARNER HOME VIDEO | 42 | 0 |

|   |      |           |   |    |     |                                                                                                                             |                                                                                |    |   |
|---|------|-----------|---|----|-----|-----------------------------------------------------------------------------------------------------------------------------|--------------------------------------------------------------------------------|----|---|
|   |      |           |   |    |     | TELEVISION STUDIOS                                                                                                          |                                                                                |    |   |
| 4 | 2018 | RIVERDALE | 2 | 20 | 13+ | THE CW TELEVISION NETWORK, ARCHIE COMICS PUBLICATIONS, WARNER BROS. TELEVISION, CANADA FILM CAPITAL, CBS TELEVISION STUDIOS | THE CW NETWORK, NETFLIX, WARNER ARCHIVE COLLECTION, DIZIMAX, WARNER HOME VIDEO | 42 | 0 |
| 4 | 2018 | RIVERDALE | 2 | 21 | 13+ | THE CW TELEVISION NETWORK, ARCHIE COMICS PUBLICATIONS, WARNER BROS. TELEVISION, CANADA FILM CAPITAL, CBS TELEVISION STUDIOS | THE CW NETWORK, NETFLIX, WARNER ARCHIVE COLLECTION, DIZIMAX, WARNER HOME VIDEO | 42 | 0 |
| 4 | 2018 | RIVERDALE | 2 | 22 | 13+ | THE CW TELEVISION NETWORK, ARCHIE COMICS PUBLICATIONS, WARNER BROS. TELEVISION, CANADA FILM CAPITAL, CBS                    | THE CW NETWORK, NETFLIX, WARNER ARCHIVE COLLECTION, DIZIMAX, WARNER HOME VIDEO | 42 | 0 |



|   |      |           |   |   |     |                                                                                                                             |                                                                                |    |   |
|---|------|-----------|---|---|-----|-----------------------------------------------------------------------------------------------------------------------------|--------------------------------------------------------------------------------|----|---|
|   |      |           |   |   |     | TELEVISION STUDIOS                                                                                                          |                                                                                |    |   |
| 4 | 2018 | RIVERDALE | 3 | 1 | 13+ | THE CW TELEVISION NETWORK, ARCHIE COMICS PUBLICATIONS, WARNER BROS. TELEVISION, CANADA FILM CAPITAL, CBS TELEVISION STUDIOS | THE CW NETWORK, NETFLIX, WARNER ARCHIVE COLLECTION, DIZIMAX, WARNER HOME VIDEO | 42 | 0 |
| 4 | 2018 | RIVERDALE | 3 | 2 | 13+ | THE CW TELEVISION NETWORK, ARCHIE COMICS PUBLICATIONS, WARNER BROS. TELEVISION, CANADA FILM CAPITAL, CBS TELEVISION STUDIOS | THE CW NETWORK, NETFLIX, WARNER ARCHIVE COLLECTION, DIZIMAX, WARNER HOME VIDEO | 42 | 0 |
| 4 | 2018 | RIVERDALE | 3 | 3 | 13+ | THE CW TELEVISION NETWORK, ARCHIE COMICS PUBLICATIONS, WARNER BROS. TELEVISION, CANADA FILM CAPITAL, CBS                    | THE CW NETWORK, NETFLIX, WARNER ARCHIVE COLLECTION, DIZIMAX, WARNER HOME VIDEO | 42 | 0 |

|   |      |           |   |   |     |                                                                                                                             |                                                                                |    |   |
|---|------|-----------|---|---|-----|-----------------------------------------------------------------------------------------------------------------------------|--------------------------------------------------------------------------------|----|---|
|   |      |           |   |   |     | TELEVISION STUDIOS                                                                                                          |                                                                                |    |   |
| 4 | 2018 | RIVERDALE | 3 | 4 | 13+ | THE CW TELEVISION NETWORK, ARCHIE COMICS PUBLICATIONS, WARNER BROS. TELEVISION, CANADA FILM CAPITAL, CBS TELEVISION STUDIOS | THE CW NETWORK, NETFLIX, WARNER ARCHIVE COLLECTION, DIZIMAX, WARNER HOME VIDEO | 42 | 0 |
| 4 | 2018 | RIVERDALE | 3 | 5 | 13+ | THE CW TELEVISION NETWORK, ARCHIE COMICS PUBLICATIONS, WARNER BROS. TELEVISION, CANADA FILM CAPITAL, CBS TELEVISION STUDIOS | THE CW NETWORK, NETFLIX, WARNER ARCHIVE COLLECTION, DIZIMAX, WARNER HOME VIDEO | 42 | 0 |
| 4 | 2018 | RIVERDALE | 3 | 6 | 13+ | THE CW TELEVISION NETWORK, ARCHIE COMICS PUBLICATIONS, WARNER BROS. TELEVISION, CANADA FILM CAPITAL, CBS                    | THE CW NETWORK, NETFLIX, WARNER ARCHIVE COLLECTION, DIZIMAX, WARNER HOME VIDEO | 42 | 0 |

|   |      |           |   |   |     |                                                                                                                             |                                                                                |    |    |
|---|------|-----------|---|---|-----|-----------------------------------------------------------------------------------------------------------------------------|--------------------------------------------------------------------------------|----|----|
|   |      |           |   |   |     | TELEVISION STUDIOS                                                                                                          |                                                                                |    |    |
| 4 | 2018 | RIVERDALE | 3 | 7 | 13+ | THE CW TELEVISION NETWORK, ARCHIE COMICS PUBLICATIONS, WARNER BROS. TELEVISION, CANADA FILM CAPITAL, CBS TELEVISION STUDIOS | THE CW NETWORK, NETFLIX, WARNER ARCHIVE COLLECTION, DIZIMAX, WARNER HOME VIDEO | 42 | 0  |
| 4 | 2018 | RIVERDALE | 3 | 8 | 13+ | THE CW TELEVISION NETWORK, ARCHIE COMICS PUBLICATIONS, WARNER BROS. TELEVISION, CANADA FILM CAPITAL, CBS TELEVISION STUDIOS | THE CW NETWORK, NETFLIX, WARNER ARCHIVE COLLECTION, DIZIMAX, WARNER HOME VIDEO | 42 | 0  |
| 5 | 2015 | NARCOS    | 1 | 1 | 16+ | CHRIS BRANCATO CARLO BERNARD DENG MIRO                                                                                      | NETFLIX                                                                        | 46 | 40 |
| 5 | 2015 | NARCOS    | 1 | 2 | 16+ | CHRIS BRANCATO CARLO BERNARD DENG MIRO                                                                                      | NETFLIX                                                                        | 47 | 39 |
| 5 | 2015 | NARCOS    | 1 | 3 | 16+ | CHRIS BRANCATO CARLO BERNARD DENG MIRO                                                                                      | NETFLIX                                                                        | 47 | 45 |

|   |      |        |   |    |     |                                                    |         |    |    |
|---|------|--------|---|----|-----|----------------------------------------------------|---------|----|----|
| 5 | 2015 | NARCOS | 1 | 4  | 16+ | CHRIS BRANCATO<br>CARLO BERNARD<br>DENG MIRO       | NETFLIX | 44 | 27 |
| 5 | 2015 | NARCOS | 1 | 5  | 16+ | CHRIS BRANCATO<br>CARLO BERNARD<br>DENG MIRO       | NETFLIX | 55 | 56 |
| 5 | 2015 | NARCOS | 1 | 6  | 16+ | CHRIS BRANCATO<br>CARLO BERNARD<br>DENG MIRO       | NETFLIX | 50 | 19 |
| 5 | 2015 | NARCOS | 1 | 7  | 16+ | CHRIS BRANCATO<br>CARLO BERNARD<br>DENG MIRO       | NETFLIX | 50 | 26 |
| 5 | 2015 | NARCOS | 1 | 8  | 16+ | CHRIS BRANCATO<br>CARLO BERNARD<br>DENG MIRO       | NETFLIX | 51 | 37 |
| 5 | 2015 | NARCOS | 1 | 9  | 16+ | CHRIS BRANCATO<br>CARLO BERNARD<br>DENG MIRO       | NETFLIX | 51 | 37 |
| 5 | 2015 | NARCOS | 1 | 10 | 16+ | CHRIS BRANCATO<br>CARLO BERNARD<br>DENG MIRO       | NETFLIX | 45 | 7  |
| 5 | 2016 | NARCOS | 2 | 1  | 16+ | CHRIS BRANCATO,<br>CARLO BERNARD,<br>AND DOUG MIRO | NETFLIX | 53 | 16 |
| 5 | 2016 | NARCOS | 2 | 2  | 16+ | CHRIS BRANCATO,<br>CARLO BERNARD,<br>AND DOUG MIRO | NETFLIX | 46 | 30 |
| 5 | 2016 | NARCOS | 2 | 3  | 16+ | CHRIS BRANCATO,<br>CARLO BERNARD,<br>AND DOUG MIRO | NETFLIX | 46 | 30 |
| 5 | 2016 | NARCOS | 2 | 4  | 16+ | CHRIS BRANCATO,<br>CARLO BERNARD,<br>AND DOUG MIRO | NETFLIX | 46 | 57 |

|   |      |        |   |    |     |                                                    |         |    |    |
|---|------|--------|---|----|-----|----------------------------------------------------|---------|----|----|
| 5 | 2016 | NARCOS | 2 | 5  | 16+ | CHRIS BRANCATO,<br>CARLO BERNARD,<br>AND DOUG MIRO | NETFLIX | 52 | 54 |
| 5 | 2016 | NARCOS | 2 | 6  | 16+ | CHRIS BRANCATO,<br>CARLO BERNARD,<br>AND DOUG MIRO | NETFLIX | 54 | 16 |
| 5 | 2016 | NARCOS | 2 | 7  | 16+ | CHRIS BRANCATO,<br>CARLO BERNARD,<br>AND DOUG MIRO | NETFLIX | 56 | 23 |
| 5 | 2016 | NARCOS | 2 | 8  | 16+ | CHRIS BRANCATO,<br>CARLO BERNARD,<br>AND DOUG MIRO | NETFLIX | 56 | 24 |
| 5 | 2016 | NARCOS | 2 | 9  | 16+ | CHRIS BRANCATO,<br>CARLO BERNARD,<br>AND DOUG MIRO | NETFLIX | 56 | 23 |
| 5 | 2016 | NARCOS | 2 | 10 | 16+ | CHRIS BRANCATO,<br>CARLO BERNARD,<br>AND DOUG MIRO | NETFLIX | 52 | 28 |
| 5 | 2017 | NARCOS | 3 | 1  | 16+ | GAUMONT<br>INTERNATIONAL<br>TELEVISION             | NETFLIX | 54 | 30 |
| 5 | 2017 | NARCOS | 3 | 2  | 16+ | GAUMONT<br>INTERNATIONAL<br>TELEVISION             | NETFLIX | 49 | 23 |
| 5 | 2017 | NARCOS | 3 | 3  | 16+ | GAUMONT<br>INTERNATIONAL<br>TELEVISION             | NETFLIX | 59 | 45 |
| 5 | 2017 | NARCOS | 3 | 4  | 16+ | GAUMONT<br>INTERNATIONAL<br>TELEVISION             | NETFLIX | 52 | 11 |
| 5 | 2017 | NARCOS | 3 | 5  | 16+ | GAUMONT<br>INTERNATIONAL<br>TELEVISION             | NETFLIX | 60 | 26 |

|   |      |              |   |    |     |                                  |              |    |    |
|---|------|--------------|---|----|-----|----------------------------------|--------------|----|----|
| 5 | 2017 | NARCOS       | 3 | 6  | 16+ | GAUMONT INTERNATIONAL TELEVISION | NETFLIX      | 57 | 14 |
| 5 | 2017 | NARCOS       | 3 | 7  | 16+ | GAUMONT INTERNATIONAL TELEVISION | NETFLIX      | 50 | 6  |
| 5 | 2017 | NARCOS       | 3 | 8  | 16+ | GAUMONT INTERNATIONAL TELEVISION | NETFLIX      | 51 | 2  |
| 5 | 2017 | NARCOS       | 3 | 9  | 16+ | GAUMONT INTERNATIONAL TELEVISION | NETFLIX      | 51 | 7  |
| 5 | 2017 | NARCOS       | 3 | 10 | 16+ | GAUMONT INTERNATIONAL TELEVISION | NETFLIX      | 50 | 35 |
| 6 | 2018 | SACRED GAMES | 1 | 1  | 18+ | PHANTOM FILMS                    | NETFLIX      | 51 | 0  |
| 6 | 2018 | SACRED GAMES | 1 | 2  | 18+ | PHANTOM FILMS                    | NETFLIX      | 52 | 10 |
| 6 | 2018 | SACRED GAMES | 1 | 3  | 18+ | PHANTOM FILMS                    | NETFLIX      | 47 | 19 |
| 6 | 2018 | SACRED GAMES | 1 | 4  | 18+ | PHANTOM FILMS                    | NETFLIX      | 54 | 19 |
| 6 | 2018 | SACRED GAMES | 1 | 5  | 18+ | PHANTOM FILMS                    | NETFLIX      | 44 | 10 |
| 6 | 2018 | SACRED GAMES | 1 | 6  | 18+ | PHANTOM FILMS                    | NETFLIX      | 47 | 1  |
| 6 | 2018 | SACRED GAMES | 1 | 7  | 18+ | PHANTOM FILMS                    | NETFLIX      | 47 | 8  |
| 6 | 2018 | SACRED GAMES | 1 | 8  | 18+ | PHANTOM FILMS                    | NETFLIX      | 47 | 0  |
| 7 | 2018 | MIRZAPUR     | 1 | 1  | 18+ | EXCEL INTERTAIMENT               | AMAZON PRIME | 53 | 4  |

|   |      |                                      |   |   |     |                                                                          |              |    |    |
|---|------|--------------------------------------|---|---|-----|--------------------------------------------------------------------------|--------------|----|----|
| 7 | 2018 | MIRZAPUR                             | 1 | 2 | 18+ | EXCEL<br>INTERTAIMENT                                                    | AMAZON PRIME | 44 | 7  |
| 7 | 2018 | MIRZAPUR                             | 1 | 3 | 18+ | EXCEL<br>INTERTAIMENT                                                    | AMAZON PRIME | 43 | 0  |
| 7 | 2018 | MIRZAPUR                             | 1 | 4 | 18+ | EXCEL<br>INTERTAIMENT                                                    | AMAZON PRIME | 42 | 26 |
| 7 | 2018 | MIRZAPUR                             | 1 | 5 | 18+ | EXCEL<br>INTERTAIMENT                                                    | AMAZON PRIME | 48 | 15 |
| 7 | 2018 | MIRZAPUR                             | 1 | 6 | 18+ | EXCEL<br>INTERTAIMENT                                                    | AMAZON PRIME | 48 | 4  |
| 7 | 2018 | MIRZAPUR                             | 1 | 7 | 18+ | EXCEL<br>INTERTAIMENT                                                    | AMAZON PRIME | 52 | 11 |
| 7 | 2018 | MIRZAPUR                             | 1 | 8 | 18+ | EXCEL<br>INTERTAIMENT                                                    | AMAZON PRIME | 47 | 11 |
| 7 | 2018 | MIRZAPUR                             | 1 | 9 | 18+ | EXCEL<br>INTERTAIMENT                                                    | AMAZON PRIME | 46 | 0  |
| 8 | 2018 | CHILLING<br>ADVENTURES<br>OF SABRINA | 1 | 1 | 16+ | BERLANTI<br>PRODUCTIONS,<br>ARCHIE COMICS,<br>WARNER BROS.<br>TELEVISION | NETFLIX      | 61 | 35 |
| 8 | 2018 | CHILLING<br>ADVENTURES<br>OF SABRINA | 1 | 2 | 16+ | BERLANTI<br>PRODUCTIONS,<br>ARCHIE COMICS,<br>WARNER BROS.<br>TELEVISION | NETFLIX      | 57 | 11 |
| 8 | 2018 | CHILLING<br>ADVENTURES<br>OF SABRINA | 1 | 3 | 16+ | BERLANTI<br>PRODUCTIONS,<br>ARCHIE COMICS,<br>WARNER BROS.<br>TELEVISION | NETFLIX      | 57 | 26 |

|   |      |                                |   |    |     |                                                              |         |    |    |
|---|------|--------------------------------|---|----|-----|--------------------------------------------------------------|---------|----|----|
| 8 | 2018 | CHILLING ADVENTURES OF SABRINA | 1 | 4  | 16+ | BERLANTI PRODUCTIONS, ARCHIE COMICS, WARNER BROS. TELEVISION | NETFLIX | 60 | 6  |
| 8 | 2018 | CHILLING ADVENTURES OF SABRINA | 1 | 5  | 16+ | BERLANTI PRODUCTIONS, ARCHIE COMICS, WARNER BROS. TELEVISION | NETFLIX | 53 | 9  |
| 8 | 2018 | CHILLING ADVENTURES OF SABRINA | 1 | 6  | 16+ | BERLANTI PRODUCTIONS, ARCHIE COMICS, WARNER BROS. TELEVISION | NETFLIX | 49 | 37 |
| 8 | 2018 | CHILLING ADVENTURES OF SABRINA | 1 | 7  | 16+ | BERLANTI PRODUCTIONS, ARCHIE COMICS, WARNER BROS. TELEVISION | NETFLIX | 55 | 3  |
| 8 | 2018 | CHILLING ADVENTURES OF SABRINA | 1 | 8  | 16+ | BERLANTI PRODUCTIONS, ARCHIE COMICS, WARNER BROS. TELEVISION | NETFLIX | 56 | 15 |
| 8 | 2018 | CHILLING ADVENTURES OF SABRINA | 1 | 9  | 16+ | BERLANTI PRODUCTIONS, ARCHIE COMICS, WARNER BROS. TELEVISION | NETFLIX | 61 | 7  |
| 8 | 2018 | CHILLING ADVENTURES OF SABRINA | 1 | 10 | 16+ | BERLANTI PRODUCTIONS, ARCHIE COMICS,                         | NETFLIX | 63 | 17 |



|   |      |                                |   |    |     |                                                                                                |                 |    |   |
|---|------|--------------------------------|---|----|-----|------------------------------------------------------------------------------------------------|-----------------|----|---|
|   |      |                                |   |    |     | WARNER BROS. TELEVISION                                                                        |                 |    |   |
| 8 | 2018 | CHILLING ADVENTURES OF SABRINA | 1 | 11 | 16+ | BERLANTI PRODUCTIONS, ARCHIE COMICS, WARNER BROS. TELEVISION                                   | NETFLIX         | 55 | 5 |
| 9 | 2017 | 13 REASONS WHY                 | 1 | 1  | 16+ | JULY MOON PRODUCTIONS, KICKED TO THE CURB PRODUCTIONS, ANONYMOUS CONTENT, PARAMOUNT TELEVISION | NETFLIX, VIACOM | 54 | 0 |
| 9 | 2017 | 13 REASONS WHY                 | 1 | 2  | 16+ | JULY MOON PRODUCTIONS, KICKED TO THE CURB PRODUCTIONS, ANONYMOUS CONTENT, PARAMOUNT TELEVISION | NETFLIX, VIACOM | 51 | 0 |
| 9 | 2017 | 13 REASONS WHY                 | 1 | 3  | 16+ | JULY MOON PRODUCTIONS, KICKED TO THE CURB PRODUCTIONS, ANONYMOUS CONTENT,                      | NETFLIX, VIACOM | 57 | 0 |

|   |      |                   |   |   |     |                                                                                                                        |                 |    |   |
|---|------|-------------------|---|---|-----|------------------------------------------------------------------------------------------------------------------------|-----------------|----|---|
|   |      |                   |   |   |     | PARAMOUNT<br>TELEVISION                                                                                                |                 |    |   |
| 9 | 2017 | 13 REASONS<br>WHY | 1 | 4 | 16+ | JULY MOON<br>PRODUCTIONS,<br>KICKED TO THE<br>CURB<br>PRODUCTIONS,<br>ANONYMOUS<br>CONTENT,<br>PARAMOUNT<br>TELEVISION | NETFLIX, VIACOM | 57 | 0 |
| 9 | 2017 | 13 REASONS<br>WHY | 1 | 5 | 16+ | JULY MOON<br>PRODUCTIONS,<br>KICKED TO THE<br>CURB<br>PRODUCTIONS,<br>ANONYMOUS<br>CONTENT,<br>PARAMOUNT<br>TELEVISION | NETFLIX, VIACOM | 58 | 0 |
| 9 | 2017 | 13 REASONS<br>WHY | 1 | 6 | 16+ | JULY MOON<br>PRODUCTIONS,<br>KICKED TO THE<br>CURB<br>PRODUCTIONS,<br>ANONYMOUS<br>CONTENT,<br>PARAMOUNT<br>TELEVISION | NETFLIX, VIACOM | 52 | 0 |
| 9 | 2017 | 13 REASONS<br>WHY | 1 | 7 | 16+ | JULY MOON<br>PRODUCTIONS,<br>KICKED TO THE<br>CURB                                                                     | NETFLIX, VIACOM | 53 | 0 |

|   |      |                   |   |    |     |                                                                                                                        |                 |    |   |
|---|------|-------------------|---|----|-----|------------------------------------------------------------------------------------------------------------------------|-----------------|----|---|
|   |      |                   |   |    |     | PRODUCTIONS,<br>ANONYMOUS<br>CONTENT,<br>PARAMOUNT<br>TELEVISION                                                       |                 |    |   |
| 9 | 2017 | 13 REASONS<br>WHY | 1 | 8  | 16+ | JULY MOON<br>PRODUCTIONS,<br>KICKED TO THE<br>CURB<br>PRODUCTIONS,<br>ANONYMOUS<br>CONTENT,<br>PARAMOUNT<br>TELEVISION | NETFLIX, VIACOM | 53 | 0 |
| 9 | 2017 | 13 REASONS<br>WHY | 1 | 9  | 16+ | JULY MOON<br>PRODUCTIONS,<br>KICKED TO THE<br>CURB<br>PRODUCTIONS,<br>ANONYMOUS<br>CONTENT,<br>PARAMOUNT<br>TELEVISION | NETFLIX, VIACOM | 58 | 0 |
| 9 | 2017 | 13 REASONS<br>WHY | 1 | 10 | 16+ | JULY MOON<br>PRODUCTIONS,<br>KICKED TO THE<br>CURB<br>PRODUCTIONS,<br>ANONYMOUS<br>CONTENT,<br>PARAMOUNT<br>TELEVISION | NETFLIX, VIACOM | 49 | 0 |

|   |      |                |   |    |     |                                                                                                |                 |    |   |
|---|------|----------------|---|----|-----|------------------------------------------------------------------------------------------------|-----------------|----|---|
| 9 | 2017 | 13 REASONS WHY | 1 | 11 | 16+ | JULY MOON PRODUCTIONS, KICKED TO THE CURB PRODUCTIONS, ANONYMOUS CONTENT, PARAMOUNT TELEVISION | NETFLIX, VIACOM | 54 | 0 |
| 9 | 2017 | 13 REASONS WHY | 1 | 12 | 16+ | JULY MOON PRODUCTIONS, KICKED TO THE CURB PRODUCTIONS, ANONYMOUS CONTENT, PARAMOUNT TELEVISION | NETFLIX, VIACOM | 61 | 0 |
| 9 | 2017 | 13 REASONS WHY | 1 | 13 | 16+ | JULY MOON PRODUCTIONS, KICKED TO THE CURB PRODUCTIONS, ANONYMOUS CONTENT, PARAMOUNT TELEVISION | NETFLIX, VIACOM | 60 | 0 |
| 9 | 2018 | 13 REASONS WHY | 2 | 1  | 16+ | JULY MOON PRODUCTIONS, KICKED TO THE CURB PRODUCTIONS, ANONYMOUS CONTENT,                      | NETFLIX, VIACOM | 59 | 0 |

|   |      |                   |   |   |     |                                                                                                                        |                 |    |   |
|---|------|-------------------|---|---|-----|------------------------------------------------------------------------------------------------------------------------|-----------------|----|---|
|   |      |                   |   |   |     | PARAMOUNT<br>TELEVISION                                                                                                |                 |    |   |
| 9 | 2018 | 13 REASONS<br>WHY | 2 | 2 | 16+ | JULY MOON<br>PRODUCTIONS,<br>KICKED TO THE<br>CURB<br>PRODUCTIONS,<br>ANONYMOUS<br>CONTENT,<br>PARAMOUNT<br>TELEVISION | NETFLIX, VIACOM | 59 | 0 |
| 9 | 2018 | 13 REASONS<br>WHY | 2 | 3 | 16+ | JULY MOON<br>PRODUCTIONS,<br>KICKED TO THE<br>CURB<br>PRODUCTIONS,<br>ANONYMOUS<br>CONTENT,<br>PARAMOUNT<br>TELEVISION | NETFLIX, VIACOM | 56 | 0 |
| 9 | 2018 | 13 REASONS<br>WHY | 2 | 4 | 16+ | JULY MOON<br>PRODUCTIONS,<br>KICKED TO THE<br>CURB<br>PRODUCTIONS,<br>ANONYMOUS<br>CONTENT,<br>PARAMOUNT<br>TELEVISION | NETFLIX, VIACOM | 56 | 0 |
| 9 | 2018 | 13 REASONS<br>WHY | 2 | 5 | 16+ | JULY MOON<br>PRODUCTIONS,<br>KICKED TO THE<br>CURB                                                                     | NETFLIX, VIACOM | 56 | 0 |

|   |      |                   |   |   |     |                                                                                                                        |                 |    |   |
|---|------|-------------------|---|---|-----|------------------------------------------------------------------------------------------------------------------------|-----------------|----|---|
|   |      |                   |   |   |     | PRODUCTIONS,<br>ANONYMOUS<br>CONTENT,<br>PARAMOUNT<br>TELEVISION                                                       |                 |    |   |
| 9 | 2018 | 13 REASONS<br>WHY | 2 | 6 | 16+ | JULY MOON<br>PRODUCTIONS,<br>KICKED TO THE<br>CURB<br>PRODUCTIONS,<br>ANONYMOUS<br>CONTENT,<br>PARAMOUNT<br>TELEVISION | NETFLIX, VIACOM | 57 | 0 |
| 9 | 2018 | 13 REASONS<br>WHY | 2 | 7 | 16+ | JULY MOON<br>PRODUCTIONS,<br>KICKED TO THE<br>CURB<br>PRODUCTIONS,<br>ANONYMOUS<br>CONTENT,<br>PARAMOUNT<br>TELEVISION | NETFLIX, VIACOM | 56 | 0 |
| 9 | 2018 | 13 REASONS<br>WHY | 2 | 8 | 16+ | JULY MOON<br>PRODUCTIONS,<br>KICKED TO THE<br>CURB<br>PRODUCTIONS,<br>ANONYMOUS<br>CONTENT,<br>PARAMOUNT<br>TELEVISION | NETFLIX, VIACOM | 57 | 0 |

|   |      |                |   |    |     |                                                                                                |                 |    |   |
|---|------|----------------|---|----|-----|------------------------------------------------------------------------------------------------|-----------------|----|---|
| 9 | 2018 | 13 REASONS WHY | 2 | 9  | 16+ | JULY MOON PRODUCTIONS, KICKED TO THE CURB PRODUCTIONS, ANONYMOUS CONTENT, PARAMOUNT TELEVISION | NETFLIX, VIACOM | 57 |   |
| 9 | 2018 | 13 REASONS WHY | 2 | 10 | 16+ | JULY MOON PRODUCTIONS, KICKED TO THE CURB PRODUCTIONS, ANONYMOUS CONTENT, PARAMOUNT TELEVISION | NETFLIX, VIACOM | 54 | 0 |
| 9 | 2018 | 13 REASONS WHY | 2 | 11 | 16+ | JULY MOON PRODUCTIONS, KICKED TO THE CURB PRODUCTIONS, ANONYMOUS CONTENT, PARAMOUNT TELEVISION | NETFLIX, VIACOM | 57 | 0 |
| 9 | 2018 | 13 REASONS WHY | 2 | 12 | 16+ | JULY MOON PRODUCTIONS, KICKED TO THE CURB PRODUCTIONS, ANONYMOUS CONTENT,                      | NETFLIX, VIACOM | 56 | 0 |

|           |       |                   |   |    |     |                                                                                                                        |                 |    |    |
|-----------|-------|-------------------|---|----|-----|------------------------------------------------------------------------------------------------------------------------|-----------------|----|----|
|           |       |                   |   |    |     | PARAMOUNT<br>TELEVISION                                                                                                |                 |    |    |
| <b>9</b>  | 20148 | 13 REASONS<br>WHY | 2 | 13 | 16+ | JULY MOON<br>PRODUCTIONS,<br>KICKED TO THE<br>CURB<br>PRODUCTIONS,<br>ANONYMOUS<br>CONTENT,<br>PARAMOUNT<br>TELEVISION | NETFLIX, VIACOM | 70 | 0  |
| <b>10</b> | 2017  | THE CROWN         | 2 | 1  | 16+ | LEFT BANK<br>PICTURES, SONY<br>PICTURES<br>TELEVISION<br>PRODUCTION UK                                                 | NETFLIX         | 56 | 22 |
| <b>10</b> | 2017  | THE CROWN         | 2 | 2  | 16+ | LEFT BANK<br>PICTURES, SONY<br>PICTURES<br>TELEVISION<br>PRODUCTION UK                                                 | NETFLIX         | 54 | 29 |
| <b>10</b> | 2017  | THE CROWN         | 2 | 3  | 16+ | LEFT BANK<br>PICTURES, SONY<br>PICTURES<br>TELEVISION<br>PRODUCTION UK                                                 | NETFLIX         | 56 | 3  |
| <b>10</b> | 2017  | THE CROWN         | 2 | 4  | 16+ | LEFT BANK<br>PICTURES, SONY<br>PICTURES<br>TELEVISION<br>PRODUCTION UK                                                 | NETFLIX         | 60 | 83 |



|    |      |           |   |    |     |                                                            |         |    |    |
|----|------|-----------|---|----|-----|------------------------------------------------------------|---------|----|----|
| 10 | 2017 | THE CROWN | 2 | 5  | 16+ | LEFT BANK PICTURES, SONY PICTURES TELEVISION PRODUCTION UK | NETFLIX | 61 | 6  |
| 10 | 2017 | THE CROWN | 2 | 6  | 16+ | LEFT BANK PICTURES AND SONY PICTURES TELEVISION            | NETFLIX | 61 | 35 |
| 10 | 2017 | THE CROWN | 2 | 7  | 16+ | LEFT BANK PICTURES AND SONY PICTURES TELEVISION            | NETFLIX | 60 | 63 |
| 10 | 2017 | THE CROWN | 2 | 8  | 16+ | LEFT BANK PICTURES AND SONY PICTURES TELEVISION            | NETFLIX | 57 | 26 |
| 10 | 2017 | THE CROWN | 2 | 9  | 16+ | LEFT BANK PICTURES AND SONY PICTURES TELEVISION            | NETFLIX | 60 | 0  |
| 10 | 2017 | THE CROWN | 2 | 10 | 16+ | LEFT BANK PICTURES AND SONY PICTURES TELEVISION            | NETFLIX | 57 | 15 |
| 10 | 2016 | THE CROWN | 1 | 1  | 16+ | LEFT BANK PICTURES AND SONY PICTURES TELEVISION            | NETFLIX | 56 | 51 |
| 10 | 2016 | THE CROWN | 1 | 2  | 16+ | LEFT BANK PICTURES AND SONY PICTURES TELEVISION            | NETFLIX | 61 | 33 |

|    |      |           |   |    |     |                                                 |         |    |    |
|----|------|-----------|---|----|-----|-------------------------------------------------|---------|----|----|
| 10 | 2016 | THE CROWN | 1 | 3  | 16+ | LEFT BANK PICTURES AND SONY PICTURES TELEVISION | NETFLIX | 61 | 29 |
| 10 | 2016 | THE CROWN | 1 | 4  | 16+ | LEFT BANK PICTURES AND SONY PICTURES TELEVISION | NETFLIX | 58 | 45 |
| 10 | 2016 | THE CROWN | 1 | 5  | 16+ | LEFT BANK PICTURES AND SONY PICTURES TELEVISION | NETFLIX | 58 | 26 |
| 10 | 2016 | THE CROWN | 1 | 6  | 16+ | LEFT BANK PICTURES,SONY PICTURE TELEVISION      | NETFLEX | 58 | 36 |
| 10 | 2016 | THE CROWN | 1 | 7  | 16+ | LEFT BANK PICTURES AND SONY PICTURES TELEVISION | NETFLIX | 58 | 5  |
| 10 | 2016 | THE CROWN | 1 | 8  | 16+ | LEFT BANK PICTURES AND SONY PICTURES TELEVISION | NETFLIX | 58 | 35 |
| 10 | 2016 | THE CROWN | 1 | 9  | 16+ | LEFT BANK PICTURES,SONY PICTURE TELEVISION      | NETFLEX | 61 | 36 |
| 10 | 2016 | THE CROWN | 1 | 10 | 16+ | LEFT BANK PICTURES,SONY PICTURE TELEVISION      | NETFLEX | 55 | 21 |
